# Supplementary material for: Nanostructured Microparticles Repolarize Macrophages and Induce Cell Death in an In Vitro Model of Tumour-Associated Macrophages
Source: MDPI journal article supplement (doi:10.3390/pharmaceutics15071895), 2023-07-05
Supplement: s1 [file s1]

# Nanostructured Microparticles Repolarize Macrophages and Induce Cell Death in an In Vitro Model of Tumour-Associated Macrophages

## Supplemental Figure S4

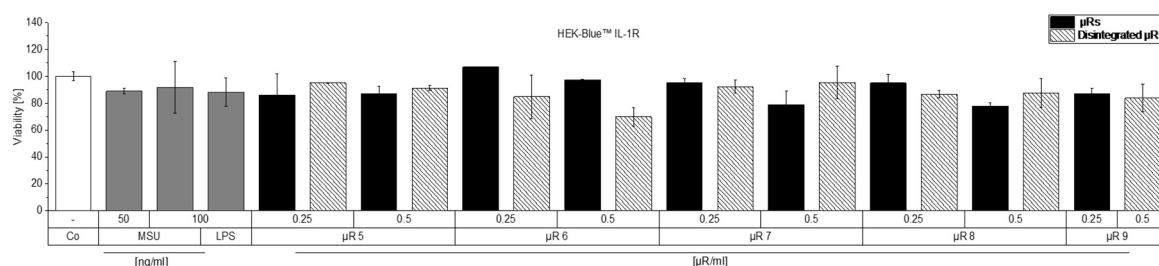

**Figure S4:** HEK-Blue™ IL1R reporter cell viability determined via MTT-assay. Cells were left untreated (Co) or incubated with positive controls (LPS (100 ng/mL) for 18 h ± monosodium urate crystals (50 and 100 μg/mL) for 6 h) or 50/100 μg/mL μRs (0.25 and 0.5 μR/cell) of different production batches (μR 5–9). μRs were unchanged (black) or disintegrated (shaded); duplicates.
