# Supplementary material for: Nanostructured Microparticles Repolarize Macrophages and Induce Cell Death in an In Vitro Model of Tumour-Associated Macrophages
Source: MDPI journal article supplement (doi:10.3390/pharmaceutics15071895), 2023-07-05
Supplement: s1 [file s1]

# Nanostructured Microparticles Repolarize Macrophages and Induce Cell Death in an In Vitro Model of Tumour-Associated Macrophages

Supplemental Figure S2

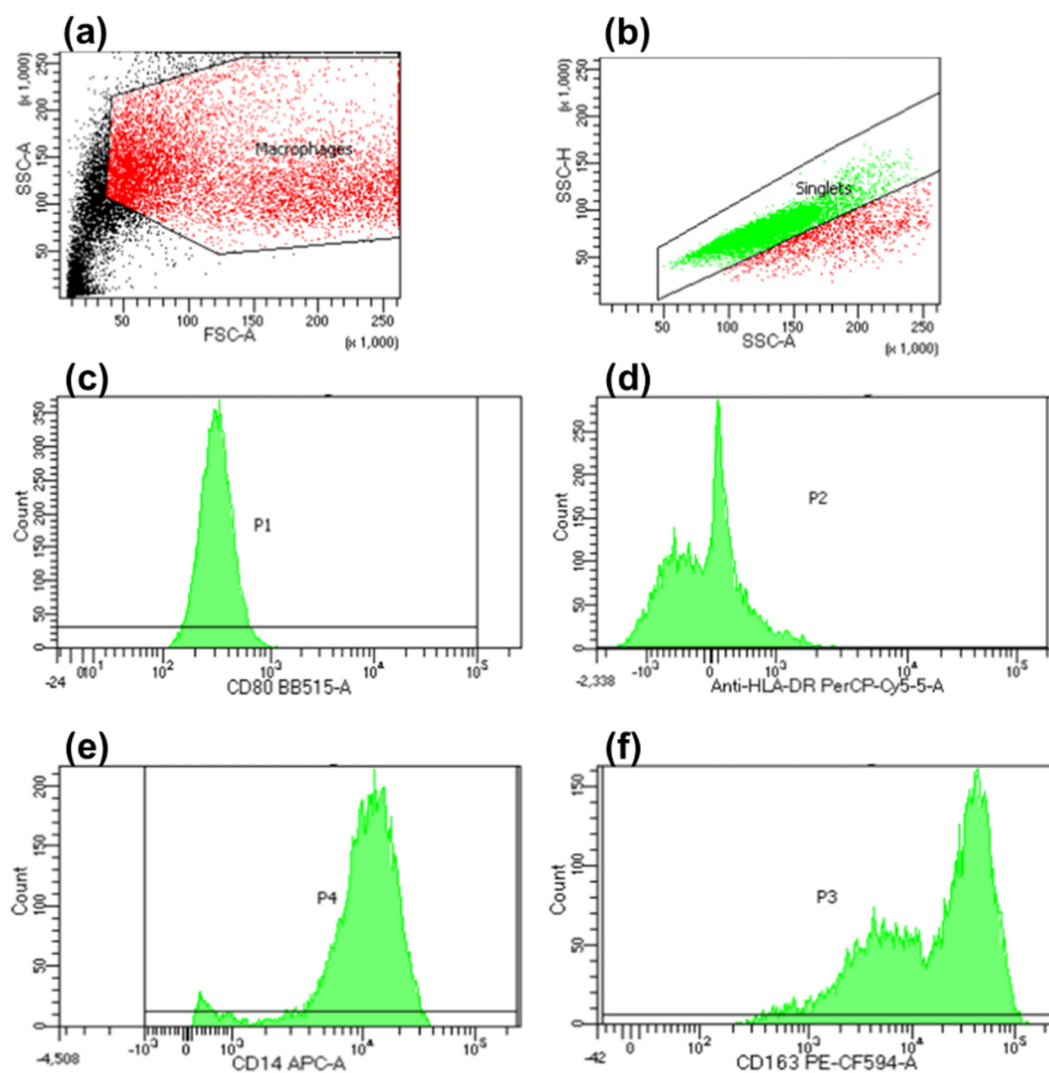

**Figure S2.** Flow cytometric gating strategy for HMDM surface markers in (M0) (a) Events in FSC-A vs. SSC-A. (b) Singlets in SSC-H vs. SSC-A. Representative histograms of surface marker expression (c) CD80, (d) HLA-DR, (e) CD14, and (f) CD163. P1-4: positive events.
