# Supplementary material for: Nanostructured Microparticles Repolarize Macrophages and Induce Cell Death in an In Vitro Model of Tumour-Associated Macrophages
Source: MDPI journal article supplement (doi:10.3390/pharmaceutics15071895), 2023-07-05
Supplement: s1 [file s1]

# Nanostructured Microparticles Repolarize Macrophages and Induce Cell Death in an In Vitro Model of Tumour-Associated Macrophages

Supplemental Figure S1

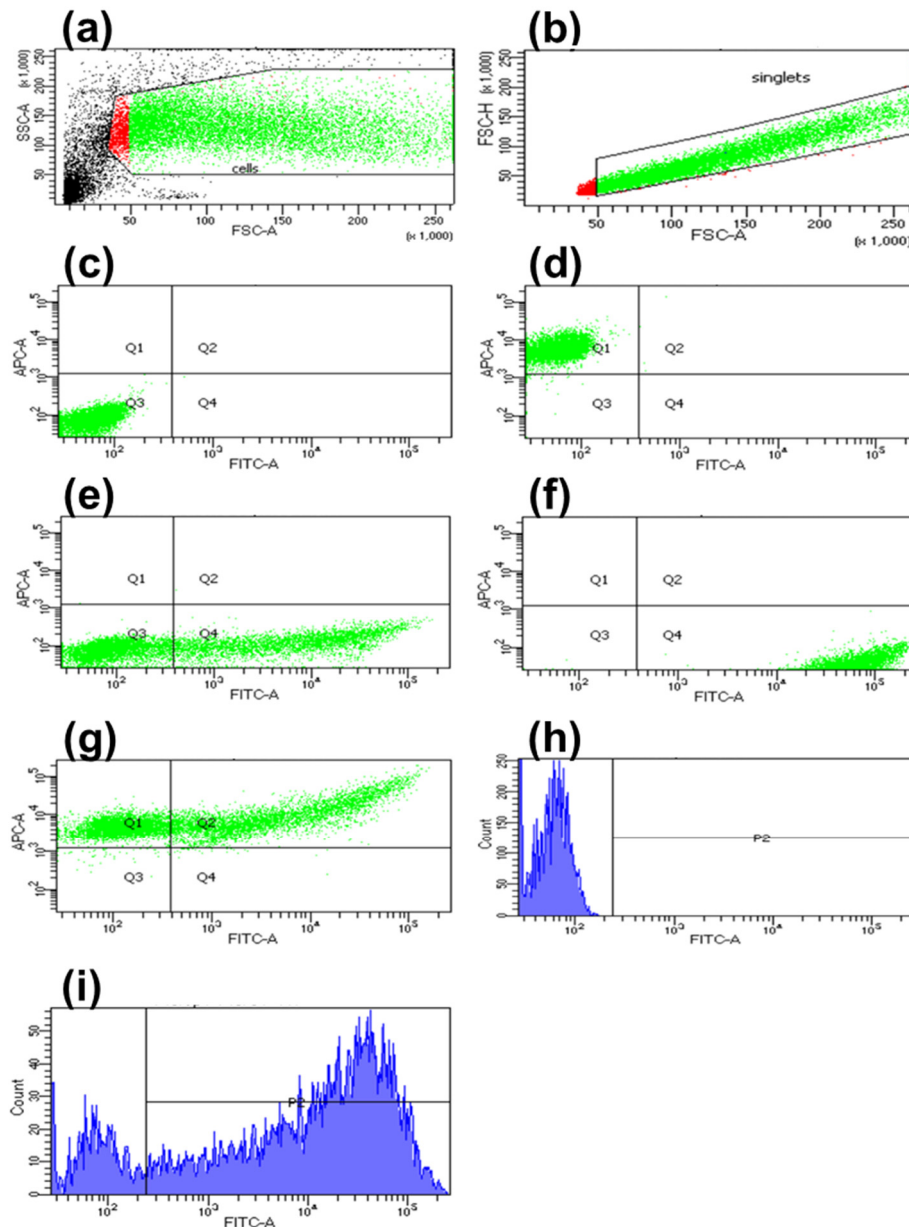

**Figure S1.** Flow cytometric gating strategy for  $\mu$ R uptake analysis. HMDMs (M0) were incubated with green fluorescent  $\mu$ Rs (2  $\mu$ Rs/ cell, FITC) and stained with CellTracker™ Deep Red Dye (APC). (a) Events in FSC-A vs. SSC-A. (b) Singlets in FSC-H vs. FSC-A. (c) Unstained cells in APC-A vs. FITC-A (Q3). (d) Stained cells (Q1). (e) Unstained cells containing  $\mu$ Rs (Q4). (f)  $\mu$ Rs (Q4). (g) Stained cells containing  $\mu$ Rs (Q2), Q1 and Q2 were used for evaluation. Representative histogram of cells without  $\mu$ Rs (h) and with  $\mu$ Rs (i). P2: FITC-positive events.
