# Supplementary material for: Nanostructured Microparticles Repolarize Macrophages and Induce Cell Death in an In Vitro Model of Tumour-Associated Macrophages
Source: MDPI journal article supplement (doi:10.3390/pharmaceutics15071895), 2023-07-05
Supplement: s1 [file s1]

# Nanostructured Microparticles Repolarize Macrophages and Induce Cell Death in an In Vitro Model of Tumour-Associated Macrophages

## Supplemental Figure S3

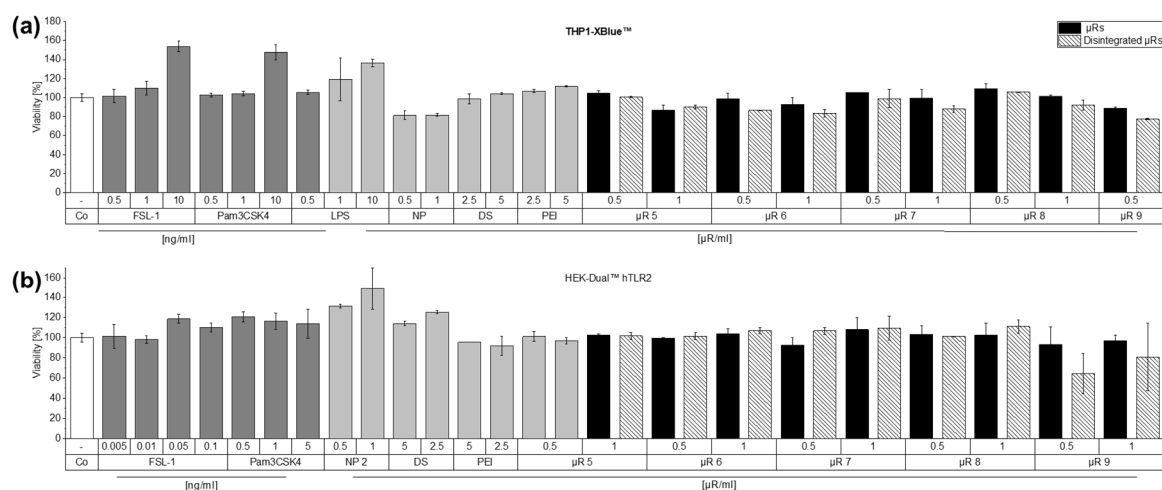

3

**Figure S3.** Reporter cell viability determined via MTT-assay after 24 h. **(a):** THP1-XBlue™ and **(b)** HEK-Dual™ hTLR2 cells, mean absorption normalized to untreated controls (Co, 100%). Cells were left untreated (Co), or incubated with FSL-1, Pam<sub>3</sub>CSK<sub>4</sub>, or LPS (ng/ml); components of silica μRs in an amount, which corresponds to 0.5 or 1 μR/cell. Silica nanoparticles (NP): 100 μg/ml, 200 μg/ml; dextran sulphate (DS) and branched polyethyleneimine (PEI): 2.5 and 5 μg/ml; with 100 or 200 μg/ml μRs (0.5 and 1 μR/cell) of different production batches (μR 5-9). μRs were unchanged (black) or disintegrated (shaded); *n* = 1, duplicates.
