# Supplementary material for: Nanostructured Microparticles Repolarize Macrophages and Induce Cell Death in an In Vitro Model of Tumour-Associated Macrophages
Source: Pharmaceutics. 2023 Jul 5;15(7):1895. doi: 10.3390/pharmaceutics15071895 (PMC10385046; doi:10.3390/pharmaceutics15071895)
Supplement: Supplementary file 1 [file pharmaceutics-15-01895-s001.zip]

Archive with 5 entries (5 files):
- Figure S1 Al-Fityan et al.pdf
- Figure S2 Al-Fityan et al.pdf
- Figure S3 Al-Fityan et al.pdf
- Figure S4 Al-Fityan et al.pdf
- Figure S5 Al-Fityan et al.pdf
